# Supplementary material for: A theoretical library of N1s core binding energies of polynitrogen molecules and ions in the gas phase
Source: Royal Society of Chemistry journal article supplement (doi:10.1039/d2cp00069e), 2022-01-01
Supplement: d2cp00069e1.pdf [file d2cp00069e1.pdf]

**Electronic supplementary information (ESI)** for “*A theoretical library of N1s core binding energies of polynitrogen molecules and ions in the gas phase*” by Du et al.

**Table S1.** Simulated N1s ionic potentials (IPs) in eV for 59 molecules. IP was computed by the  $\Delta$ KS method with the BP86 functional, based on geometry optimized at M06-2X/aug-cc-pVTZ level.

| No. | Structure                                                                           | Name              | Atom           | IP     |
|-----|-------------------------------------------------------------------------------------|-------------------|----------------|--------|
| 1   | 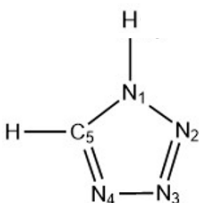   | 1H-tetrazole      | N <sub>1</sub> | 408.08 |
|     |                                                                                     |                   | N <sub>2</sub> | 407.00 |
|     |                                                                                     |                   | N <sub>3</sub> | 406.54 |
|     |                                                                                     |                   | N <sub>4</sub> | 405.82 |
| 2   |   | 1-aminotetrazole  | N <sub>1</sub> | 408.42 |
|     |                                                                                     |                   | N <sub>2</sub> | 406.59 |
|     |                                                                                     |                   | N <sub>3</sub> | 406.29 |
|     |                                                                                     |                   | N <sub>4</sub> | 405.56 |
| 3   |  | 1-methyltetrazole | N <sub>1</sub> | 407.73 |
|     |                                                                                     |                   | N <sub>2</sub> | 406.48 |
|     |                                                                                     |                   | N <sub>3</sub> | 406.08 |
|     |                                                                                     |                   | N <sub>4</sub> | 405.42 |
| 4   |  | 1-cyanotetrazole  | N <sub>1</sub> | 409.44 |
|     |                                                                                     |                   | N <sub>2</sub> | 407.79 |
|     |                                                                                     |                   | N <sub>3</sub> | 407.35 |
|     |                                                                                     |                   | N <sub>4</sub> | 406.56 |
|     |                                                                                     |                   | N              | 406.15 |

|   |                                                                                     |                   |                |        |
|---|-------------------------------------------------------------------------------------|-------------------|----------------|--------|
| 5 | 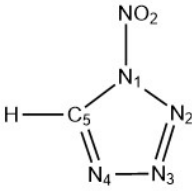   | 1-nitrotetrazole  | N <sub>1</sub> | 409.04 |
|   |                                                                                     |                   | N <sub>2</sub> | 407.79 |
|   |                                                                                     |                   | N <sub>3</sub> | 407.29 |
|   |                                                                                     |                   | N <sub>4</sub> | 406.49 |
|   |                                                                                     |                   | N              | 413.88 |
| 6 |    | 2H-tetrazole      | N <sub>1</sub> | 406.58 |
|   |                                                                                     |                   | N <sub>2</sub> | 408.50 |
|   |                                                                                     |                   | N <sub>3</sub> | 407.09 |
|   |                                                                                     |                   | N <sub>4</sub> | 406.07 |
| 7 |   | 2-aminotetrazole  | N <sub>1</sub> | 406.20 |
|   |                                                                                     |                   | N <sub>2</sub> | 408.84 |
|   |                                                                                     |                   | N <sub>3</sub> | 406.74 |
|   |                                                                                     |                   | N <sub>4</sub> | 405.78 |
|   |                                                                                     |                   | N              | 407.26 |
| 8 |  | 2-methyltetrazole | N <sub>1</sub> | 406.04 |
|   |                                                                                     |                   | N <sub>2</sub> | 408.13 |
|   |                                                                                     |                   | N <sub>3</sub> | 406.53 |
|   |                                                                                     |                   | N <sub>4</sub> | 405.57 |
| 9 |  | 2-cyanotetrazole  | N <sub>1</sub> | 407.28 |
|   |                                                                                     |                   | N <sub>2</sub> | 409.79 |
|   |                                                                                     |                   | N <sub>3</sub> | 407.80 |
|   |                                                                                     |                   | N <sub>4</sub> | 406.82 |
|   |                                                                                     |                   | N              | 406.12 |

|    |                                                                                     |                       |                |        |
|----|-------------------------------------------------------------------------------------|-----------------------|----------------|--------|
| 10 | 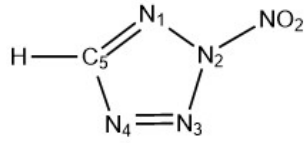   | 2-nitrotetrazole      | N <sub>1</sub> | 407.23 |
|    |                                                                                     |                       | N <sub>2</sub> | 409.21 |
|    |                                                                                     |                       | N <sub>3</sub> | 407.74 |
|    |                                                                                     |                       | N <sub>4</sub> | 406.71 |
|    |                                                                                     |                       | N              | 413.60 |
| 11 |    | 5-amino-1H-tetrazole  | N <sub>1</sub> | 407.34 |
|    |                                                                                     |                       | N <sub>2</sub> | 406.28 |
|    |                                                                                     |                       | N <sub>3</sub> | 406.06 |
|    |                                                                                     |                       | N <sub>4</sub> | 404.98 |
|    |                                                                                     |                       | N              | 406.56 |
| 12 |   | 5-methyl-1H-tetrazole | N <sub>1</sub> | 407.58 |
|    |                                                                                     |                       | N <sub>2</sub> | 406.55 |
|    |                                                                                     |                       | N <sub>3</sub> | 406.15 |
|    |                                                                                     |                       | N <sub>4</sub> | 405.27 |
| 13 |  | 5-cyano-1H-tetrazole  | N <sub>1</sub> | 408.71 |
|    |                                                                                     |                       | N <sub>2</sub> | 407.58 |
|    |                                                                                     |                       | N <sub>3</sub> | 407.19 |
|    |                                                                                     |                       | N <sub>4</sub> | 406.45 |
|    |                                                                                     |                       | N              | 405.95 |
| 14 |  | 5-nitro-1H-tetrazole  | N <sub>1</sub> | 408.94 |
|    |                                                                                     |                       | N <sub>2</sub> | 407.82 |
|    |                                                                                     |                       | N <sub>3</sub> | 407.40 |
|    |                                                                                     |                       | N <sub>4</sub> | 406.79 |
|    |                                                                                     |                       | N              | 412.88 |

|    |  |                       |                |        |
|----|--|-----------------------|----------------|--------|
| 15 |  | 5-amino-2H-tetrazole  | N <sub>1</sub> | 405.60 |
|    |  |                       | N <sub>2</sub> | 407.88 |
|    |  |                       | N <sub>3</sub> | 406.57 |
|    |  |                       | N <sub>4</sub> | 405.27 |
|    |  |                       | N              | 405.96 |
| 16 |  | 5-methyl-2H-tetrazole | N <sub>1</sub> | 406.03 |
|    |  |                       | N <sub>2</sub> | 408.09 |
|    |  |                       | N <sub>3</sub> | 406.72 |
|    |  |                       | N <sub>4</sub> | 405.55 |
| 17 |  | 5-cyano-2H-tetrazole  | N <sub>1</sub> | 407.18 |
|    |  |                       | N <sub>2</sub> | 409.12 |
|    |  |                       | N <sub>3</sub> | 407.73 |
|    |  |                       | N <sub>4</sub> | 406.71 |
|    |  |                       | N              | 405.58 |
| 18 |  | 5-nitro-2H-tetrazole  | N <sub>1</sub> | 407.52 |
|    |  |                       | N <sub>2</sub> | 409.36 |
|    |  |                       | N <sub>3</sub> | 407.94 |
|    |  |                       | N <sub>4</sub> | 407.02 |
|    |  |                       | N              | 412.35 |
| 19 |  | furazan               | N <sub>2</sub> | 406.88 |
|    |  |                       | N <sub>5</sub> | 406.88 |

|    |                                                                                     |                            |                |        |
|----|-------------------------------------------------------------------------------------|----------------------------|----------------|--------|
| 20 | 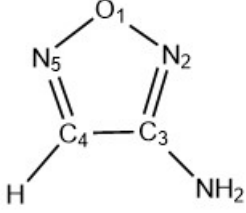   | 3-amino-1,2,5-oxadiazole   | N <sub>2</sub> | 405.75 |
|    |                                                                                     |                            | N <sub>5</sub> | 406.45 |
|    |                                                                                     |                            | N              | 406.28 |
| 21 |    | 3-methyl-1,2,5-oxadiazole  | N <sub>2</sub> | 406.28 |
|    |                                                                                     |                            | N <sub>5</sub> | 406.54 |
| 22 |    | 3-cyano-1,2,5-oxadiazole   | N <sub>2</sub> | 407.46 |
|    |                                                                                     |                            | N <sub>5</sub> | 407.51 |
|    |                                                                                     |                            | N              | 405.81 |
| 23 |  | 3-nitro-1,2,5-oxadiazole   | N <sub>2</sub> | 407.84 |
|    |                                                                                     |                            | N <sub>5</sub> | 407.67 |
|    |                                                                                     |                            | N              | 412.67 |
| 24 |  | 1,2,4,5-tetrazine          | N <sub>1</sub> | 406.85 |
|    |                                                                                     |                            | N <sub>2</sub> | 406.85 |
|    |                                                                                     |                            | N <sub>4</sub> | 406.85 |
|    |                                                                                     |                            | N <sub>5</sub> | 406.85 |
| 25 |  | 3-amino-1,2,4,5-tetrazine  | N <sub>1</sub> | 406.20 |
|    |                                                                                     |                            | N <sub>2</sub> | 405.75 |
|    |                                                                                     |                            | N              | 406.24 |
| 26 |  | 3-methyl-1,2,4,5-tetrazine | N <sub>1</sub> | 406.48 |
|    |                                                                                     |                            | N <sub>2</sub> | 406.29 |

|    |  |                            |                |        |
|----|--|----------------------------|----------------|--------|
| 27 |  | 3-cyano-1,2,4,5-tetrazine  | N <sub>1</sub> | 407.36 |
|    |  |                            | N <sub>2</sub> | 407.29 |
|    |  |                            | N              | 405.85 |
| 28 |  | 3-nitro-1,2,4,5-tetrazine  | N <sub>1</sub> | 407.50 |
|    |  |                            | N <sub>2</sub> | 407.53 |
|    |  |                            | N              | 411.87 |
| 29 |  | 5,5'-bistetrazole          | N <sub>1</sub> | 408.18 |
|    |  |                            | N <sub>2</sub> | 407.12 |
|    |  |                            | N <sub>3</sub> | 406.82 |
|    |  |                            | N <sub>4</sub> | 405.97 |
| 30 |  | 5,5'-ethylbistetrazole     | N <sub>1</sub> | 407.70 |
|    |  |                            | N <sub>2</sub> | 406.68 |
|    |  |                            | N <sub>3</sub> | 406.31 |
|    |  |                            | N <sub>4</sub> | 405.43 |
| 31 |  | 5,5'-vinylbistetrazole     | N <sub>1</sub> | 407.75 |
|    |  |                            | N <sub>2</sub> | 406.65 |
|    |  |                            | N <sub>3</sub> | 406.40 |
|    |  |                            | N <sub>4</sub> | 405.39 |
| 32 |  | 5,5'-hydrazinebistetrazole | N <sub>1</sub> | 407.63 |
|    |  |                            | N <sub>2</sub> | 406.66 |
|    |  |                            | N <sub>3</sub> | 406.42 |
|    |  |                            | N <sub>4</sub> | 405.38 |
|    |  |                            | N              | 407.21 |

|    |                                                                                     |                      |                |        |
|----|-------------------------------------------------------------------------------------|----------------------|----------------|--------|
| 33 | 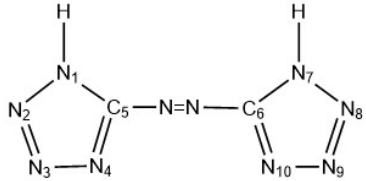   | 5,5'-azobistetrazole | N <sub>1</sub> | 408.03 |
|    |                                                                                     |                      | N <sub>2</sub> | 406.89 |
|    |                                                                                     |                      | N <sub>3</sub> | 406.59 |
|    |                                                                                     |                      | N <sub>4</sub> | 405.71 |
|    |                                                                                     |                      | N              | 406.92 |
| 34 |    | pyrrole              | N <sub>1</sub> | 406.00 |
| 35 |    | pyrazole             | N <sub>1</sub> | 406.79 |
|    |                                                                                     |                      | N <sub>2</sub> | 405.00 |
| 36 |  | imidazole            | N <sub>1</sub> | 406.54 |
|    |                                                                                     |                      | N <sub>4</sub> | 404.15 |
| 37 |  | 1,2,4-triazole       | N <sub>1</sub> | 407.38 |
|    |                                                                                     |                      | N <sub>2</sub> | 405.63 |
|    |                                                                                     |                      | N <sub>4</sub> | 404.80 |
| 38 |  | 1,2,3-triazole       | N <sub>1</sub> | 407.38 |
|    |                                                                                     |                      | N <sub>2</sub> | 406.20 |
|    |                                                                                     |                      | N <sub>3</sub> | 405.80 |
| 39 |  | 1,2,5-triazole       | N <sub>1</sub> | 407.79 |
|    |                                                                                     |                      | N <sub>2</sub> | 405.81 |
|    |                                                                                     |                      | N <sub>5</sub> | 405.81 |

|    |                                                                                     |                |                |        |
|----|-------------------------------------------------------------------------------------|----------------|----------------|--------|
| 40 | 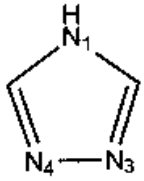   | 1,3,4-triazole | N <sub>1</sub> | 407.17 |
|    |                                                                                     |                | N <sub>3</sub> | 405.08 |
|    |                                                                                     |                | N <sub>4</sub> | 405.08 |
| 41 |    | pentazole      | N <sub>1</sub> | 409.32 |
|    |                                                                                     |                | N <sub>2</sub> | 408.01 |
|    |                                                                                     |                | N <sub>3</sub> | 407.36 |
| 42 |    | 1H-indazole    | N <sub>1</sub> | 406.26 |
|    |                                                                                     |                | N <sub>2</sub> | 404.84 |
| 43 |   | benzimidazole  | N <sub>1</sub> | 406.12 |
|    |                                                                                     |                | N <sub>3</sub> | 403.89 |
| 44 |  | pyridine       | N <sub>1</sub> | 404.43 |
| 45 |  | pyridazine     | N <sub>1</sub> | 405.38 |
|    |                                                                                     |                | N <sub>2</sub> | 405.38 |
| 46 |  | pyrimidine     | N <sub>1</sub> | 404.90 |
|    |                                                                                     |                | N <sub>3</sub> | 404.90 |



|    |                                                                                     |                   |                |        |
|----|-------------------------------------------------------------------------------------|-------------------|----------------|--------|
| 47 | 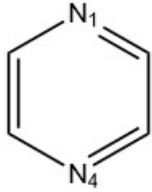   | pyrazine          | N <sub>1</sub> | 405.14 |
|    |                                                                                     |                   | N <sub>4</sub> | 405.14 |
| 48 |    | 1,2,3-triazine    | N <sub>1</sub> | 405.90 |
|    |                                                                                     |                   | N <sub>2</sub> | 406.61 |
|    |                                                                                     |                   | N <sub>3</sub> | 405.90 |
| 49 |    | 1,2,4-triazine    | N <sub>1</sub> | 406.17 |
|    |                                                                                     |                   | N <sub>2</sub> | 405.09 |
|    |                                                                                     |                   | N <sub>4</sub> | 405.90 |
| 50 |   | 1,3,5-triazine    | N <sub>1</sub> | 405.43 |
|    |                                                                                     |                   | N <sub>3</sub> | 405.43 |
|    |                                                                                     |                   | N <sub>5</sub> | 405.43 |
| 51 |  | 1,2,3,4-tetrazine | N <sub>1</sub> | 406.71 |
|    |                                                                                     |                   | N <sub>2</sub> | 407.14 |
|    |                                                                                     |                   | N <sub>3</sub> | 407.14 |
|    |                                                                                     |                   | N <sub>4</sub> | 406.71 |
| 52 |  | 1,2,3,5-tetrazine | N <sub>1</sub> | 406.35 |
|    |                                                                                     |                   | N <sub>2</sub> | 406.48 |
|    |                                                                                     |                   | N <sub>3</sub> | 407.50 |
|    |                                                                                     |                   | N <sub>5</sub> | 406.48 |

|    |                                                                                     |                  |                |        |
|----|-------------------------------------------------------------------------------------|------------------|----------------|--------|
| 53 | 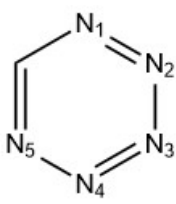   | pentazine        | N <sub>1</sub> | 407.48 |
|    |                                                                                     |                  | N <sub>2</sub> | 408.11 |
|    |                                                                                     |                  | N <sub>3</sub> | 407.72 |
|    |                                                                                     |                  | N <sub>4</sub> | 408.11 |
|    |                                                                                     |                  | N <sub>5</sub> | 407.48 |
| 54 |    | oxazole          | N <sub>3</sub> | 405.05 |
| 55 |    | isoxazole        | N <sub>2</sub> | 406.05 |
| 56 |  | 1,2,3-oxadiazole | N <sub>2</sub> | 407.44 |
|    |                                                                                     |                  | N <sub>3</sub> | 406.57 |
| 57 |  | 1,2,4-oxadiazole | N <sub>2</sub> | 406.75 |
|    |                                                                                     |                  | N <sub>4</sub> | 405.76 |
| 58 |  | 1,3,4-oxadiazole | N <sub>3</sub> | 406.01 |
|    |                                                                                     |                  | N <sub>4</sub> | 406.01 |
| 59 |  | benzoxazole      | N <sub>3</sub> | 404.71 |

**Table S2.** Simulated N1s ionic potentials in eV for 9 ions. IP was computed by the  $\Delta$ KS method with the BP86 functional, based on geometry optimized at M06-2X/aug-cc-pVTZ level.

| NO. | Structure                                                                           | Name                       | Atom           | IP     |
|-----|-------------------------------------------------------------------------------------|----------------------------|----------------|--------|
| 1   | 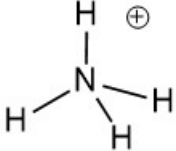   | ammonium cation            | N              | 416.74 |
| 2   |    | azide anion                | N <sup>1</sup> | 403.60 |
|     |                                                                                     |                            | N <sup>2</sup> | 397.83 |
| 3   |    | hydroxyammonium cation     | N              | 417.68 |
| 4   |   | guanidinium cation         | N              | 411.70 |
| 5   |  | tetramethylammonium cation | N              | 413.23 |
| 6   |  | aminoguanidinium cation    | N <sup>1</sup> | 411.35 |
|     |                                                                                     |                            | N <sup>2</sup> | 411.04 |
|     |                                                                                     |                            | N <sup>3</sup> | 411.86 |
|     |                                                                                     |                            | N <sup>4</sup> | 411.25 |
| 7   |  | hydrazinium cation         | N <sup>1</sup> | 416.49 |
|     |                                                                                     |                            | N <sup>2</sup> | 413.35 |

|   |                                                                                   |                    |                |        |
|---|-----------------------------------------------------------------------------------|--------------------|----------------|--------|
| 8 | 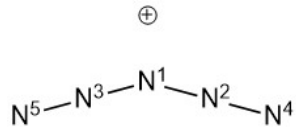 | pentazenium cation | N <sup>1</sup> | 416.69 |
|   |                                                                                   |                    | N <sup>2</sup> | 418.19 |
|   |                                                                                   |                    | N <sup>4</sup> | 416.01 |
| 9 |  | pentazolate anion  | N              | 400.46 |

**Table S3.** Simulated N1s IPs (in eV) for a few dimer systems, each in neutral-neutral (optimized in gas phase) or cation-anion (taken from crystal structure) forms. Gas phase geometry was optimized at M06-2X/aug-cc-pVTZ level. Solid state geometry was directly extracted from crystal structures in ref. 62 without optimization. IP was computed by the  $\Delta$ KS method with the BP86 functional.

| No. | Structure                                                                           | Name                                                                                             | Atom           | IP     |
|-----|-------------------------------------------------------------------------------------|--------------------------------------------------------------------------------------------------|----------------|--------|
| 1   | 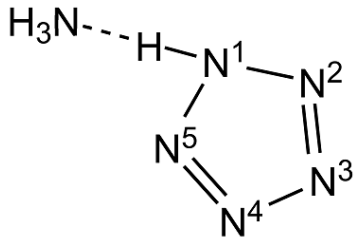   | ammonia-pentazole dimer<br>(gas geom.)<br>$\text{NH}_3 \cdots \text{HN}_5$                       | N <sup>1</sup> | 407.79 |
|     |                                                                                     |                                                                                                  | N <sup>2</sup> | 406.95 |
|     |                                                                                     |                                                                                                  | N <sup>3</sup> | 406.42 |
|     |                                                                                     |                                                                                                  | N              | 406.83 |
| 2   |   | ammonium-pentazolate dimer<br>(solid geom.)<br>$[\text{H}_3\text{N-H}]^+ \cdots [\text{N}_5]^-$  | N <sup>1</sup> | 404.55 |
|     |                                                                                     |                                                                                                  | N <sup>2</sup> | 404.42 |
|     |                                                                                     |                                                                                                  | N <sup>3</sup> | 404.17 |
|     |                                                                                     |                                                                                                  | N <sup>4</sup> | 404.23 |
|     |                                                                                     |                                                                                                  | N              | 411.90 |
| 3   |  | water-pentazolate dimer<br>(gas geom.)<br>$\text{H}_2\text{O} \cdots \text{HN}_5$                | N <sup>1</sup> | 408.31 |
|     |                                                                                     |                                                                                                  | N <sup>2</sup> | 407.25 |
|     |                                                                                     |                                                                                                  | N <sup>3</sup> | 406.68 |
| 4   |  | hydronium-pentazolate dimer<br>(solid geom.)<br>$[\text{H}_2\text{O-H}]^+ \cdots [\text{N}_5]^-$ | N <sup>1</sup> | 405.44 |
|     |                                                                                     |                                                                                                  | N <sup>2</sup> | 404.99 |
|     |                                                                                     |                                                                                                  | N <sup>3</sup> | 404.85 |
|     |                                                                                     |                                                                                                  | N <sup>5</sup> | 405.06 |
